# Supplementary material
Source: publisher site journal article supplement (https://www.dovepress.com/article/286228)
Supplement: Supplementary file 1 [file get_supplementary_file.php]

|  | Univariate | | Multivariate | | Univariate | | Multivariate | |
| --- | --- | --- | --- | --- | --- | --- | --- | --- |
| HR (95% CI) | *p* | HR (95% CI) | *p* | HR (95% CI) | *p* | HR (95% CI) | *p* |
| Chemo-immunotherapy (n=80) | Progression-free survival | | | | Overall survival | | | |
| Age ≥70 vs. <70 years | 0.87 (0.46-1.66) | 0.867 |  |  | 1.11 (0.48-2.58) | 0.800 | n.e. |  |
| Female vs. Male | 1.09 (0.64-1.87) | 0.749 |  |  | 1.32 (0.67-2.63) | 0.423 | n.e. |  |
| ECOG 1 vs 0 | **2.01 (1.08-3.72)** | **0.027** |  |  | **4.44 (2.00-10.06)** | **<0.001** | n.e. |  |
| ECOG 2 vs 0 | **2.80 (1.35-5.83)** | **0.006** |  |  | **7.12 (2.82-18.00)** | **<0.001** | n.e. |  |
| PD-L1 status (neg. vs. ≥1%) | 1.48 (0.86-2.54) | 0.155 |  |  | 1.43 (0.71-2.91) | 0.319 | n.e. |  |
| RECIST SD vs. CR/PR | **3.30 (1.64-6.66)** | **0.001** | **5.07 (2.07-12.39)** | **<0.001** | **2.90 (1.07-7.89)** | **0.037** | n.e. |  |
| RECIST PD vs. CR/PR | **7.07 (3.15-15.86)** | **<0.001** | **16.04 (5.51-46.72)** | **<0.001** | **6.99 (2.40-20.41)** | **<0.001** | n.e. |  |
| STM increase vs. decrease | **2.06 (1.04-410)** | **0.038** |  |  | 0.61 (0.18-2.11) | 0,609 | n.e. |  |
| Mono-immunotherapy (n=54) | Progression-free survival | | | | Overall survival | | | |
| Age ≥70 vs. <70 years | 0.58 (0.24-1.41) | 0.227 |  |  | 0.25 (0.03-1.89) | 0.179 |  |  |
| Female vs. Male | 0.63 (0.29-1.38) | 0.247 |  |  | 0.40 (0.11-1.39) | 0.149 |  |  |
| ECOG 1 vs 0 | 1.74 (0.75-4.05) | 0.200 |  |  | **5.85 (1.64-20.92)** | **0.007** | 4.07 (0.57-29.00) | 0.162 |
| ECOG 2 vs 0 | **3.01 (1.17-7.74)** | **0.022** |  |  | **13.12 (3.51-49.07)** | **<0.001** | **12.22 (1.72-86.74)** | **0.012** |
| PD-L1 status (neg. vs. ≥1%) | 1.80 (0.87-3.72) | 0.115 |  |  | 1.10 (0.38-3.16) | 0.866 |  |  |
| RECIST SD vs. CR/PR | 6.23 (0.80-48.5) | 0.081 | 7.21 (0.92-56.73) | 0.061 | n.e. |  |  |  |
| RECIST PD vs. CR/PR | **26.54 (3.17-222)** | **0.003** | **14.71 (1.71-126)** | **0.014** | n.e. |  |  |  |
| STM increase vs. decrease | **5.49 (1.78-16.91)** | **0.003** | **4.06 (1.15-14.33)** | **0.029** | 6.07 (0.75-49.40) | 0.092 |  |  |

Supplementary table 1. Uni- and multivariate analyses for progression-free- and overall survival for all patients in the mono-immunotherapy and chemo-immunotherapy cohort. Data are given as hazard ratio (95% confidence interval), with a ratio >1 signifying an increased risk of progression/death or death, respectively. Bold figures are for significant hazard ratios (p<0.005). HR= hazard ratio, CI= Confidence Interval, ECOG= Eastern Cooperative Oncology Group, PD-L1= Programmed Death-Ligand 1, RECIST= response evaluation criteria in solid tumors, CR=complete remission, PR=partial remission, SD=stable disease, PD= progressive disease, STM=serum tumor marker, n.e.=not evaluable


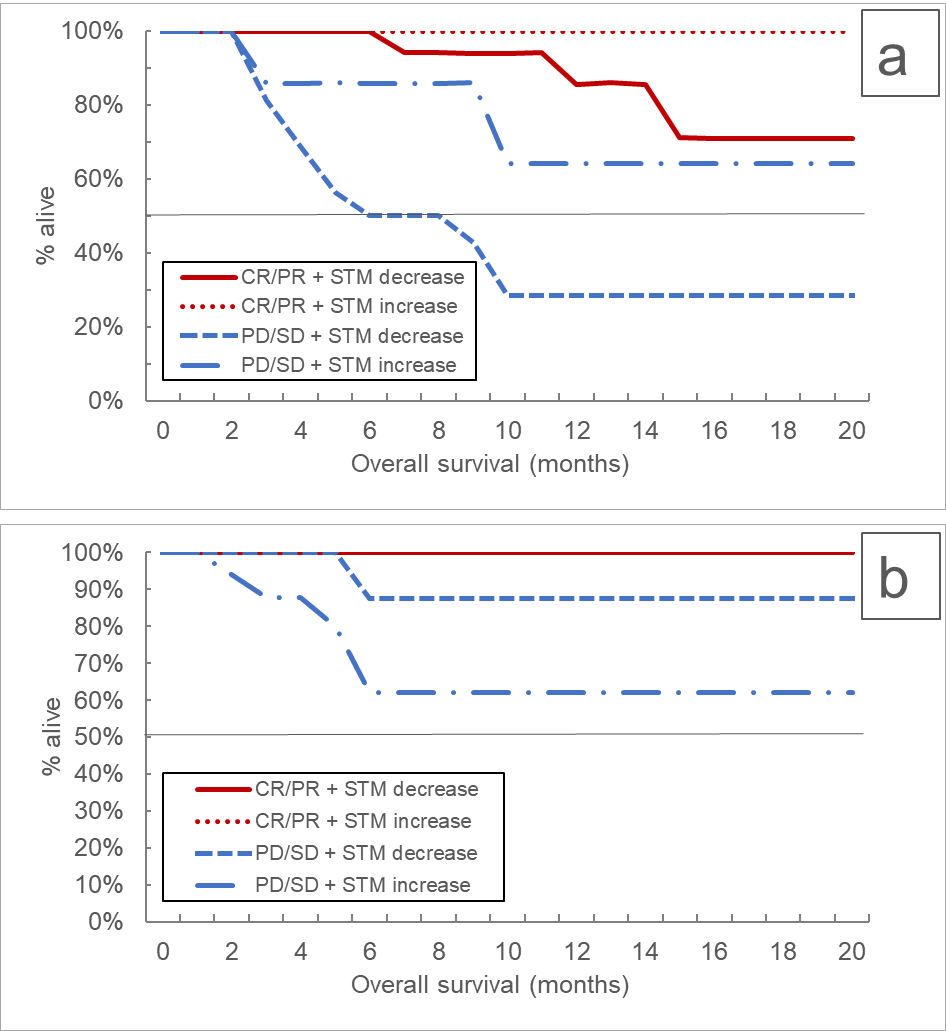


Supplementary figure 1. Kaplan-Meier curves for overall survival according to RECIST response categories and STM dynamics in the chemo-immunotherapy (a) as well as the mono-immunotherapy maintenance phase (b). RECIST=response evaluation criteria in solid tumors, CR=complete remission, PR=partial remission, SD=stable disease, PD= progressive disease, STM=serum tumor marker
